# Supplementary material for: Projecting heat-related excess mortality under climate change scenarios in China
Source: PubMed Central journal article supplement (PMC7884743; doi:10.1038/s41467-021-21305-1), 2021-02-15
Supplement: 41467_2021_21305_MOESM3_ESM.pdf [file 41467_2021_21305_MOESM3_ESM.pdf]

## Description of Additional Supplementary Files

**File Name:** Supplementary Data 1

**Description:** The annual mortality rate (per million populations) and annual mean temperature (oC) in 161 Chinese disease surveillance points.

**File Name:** Supplementary Data 2

**Description:** The temporal trends in annual projected temperature under two RCP scenarios in China.

**File Name:** Supplementary Data 3.

**Description:** The trends in heat-related excess mortality by period, cause and individual characteristic in China, assuming no adaptation or population changes.

**File Name:** Supplementary Data 4

**Description:** The heat-related attributable number of deaths by period, age and population scenario in China.
